# Supplementary material for: DNA Sequence Evolution and Rare Homoeologous Conversion in Tetraploid Cotton
Source: PubMed Central journal article supplement (PMC4864293; doi:10.1371/journal.pgen.1006012), 2016-05-11

S1 Fig

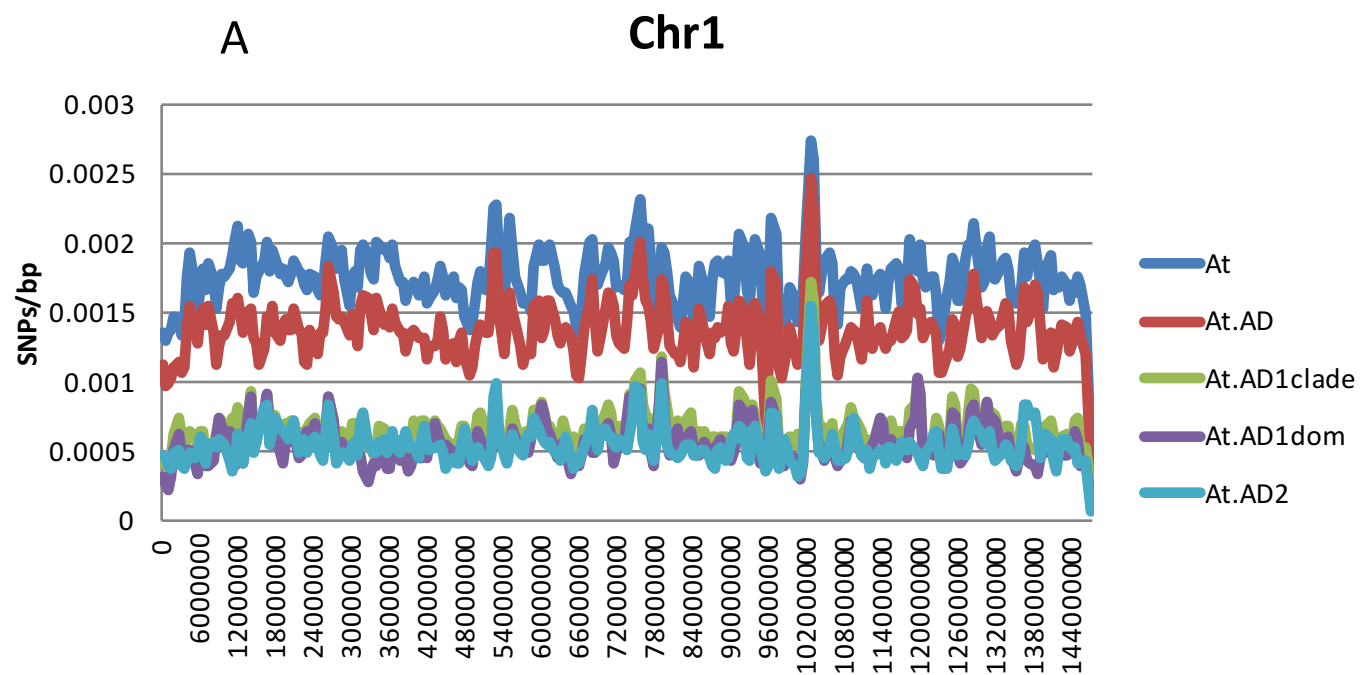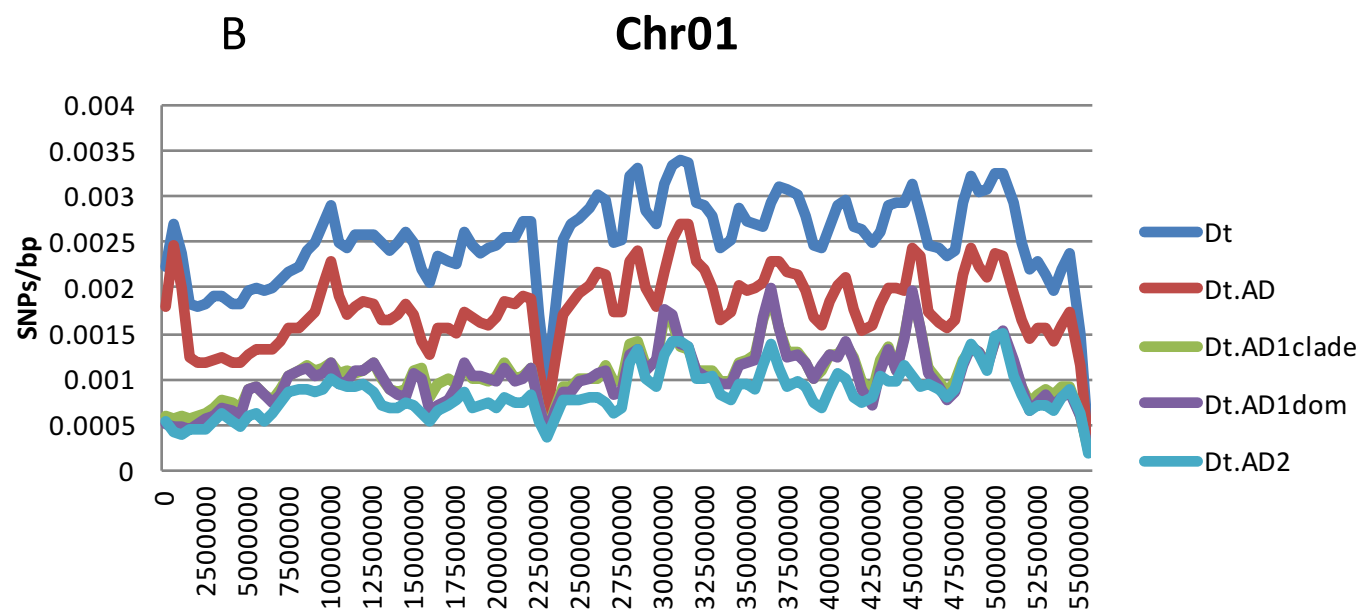

# Chr1

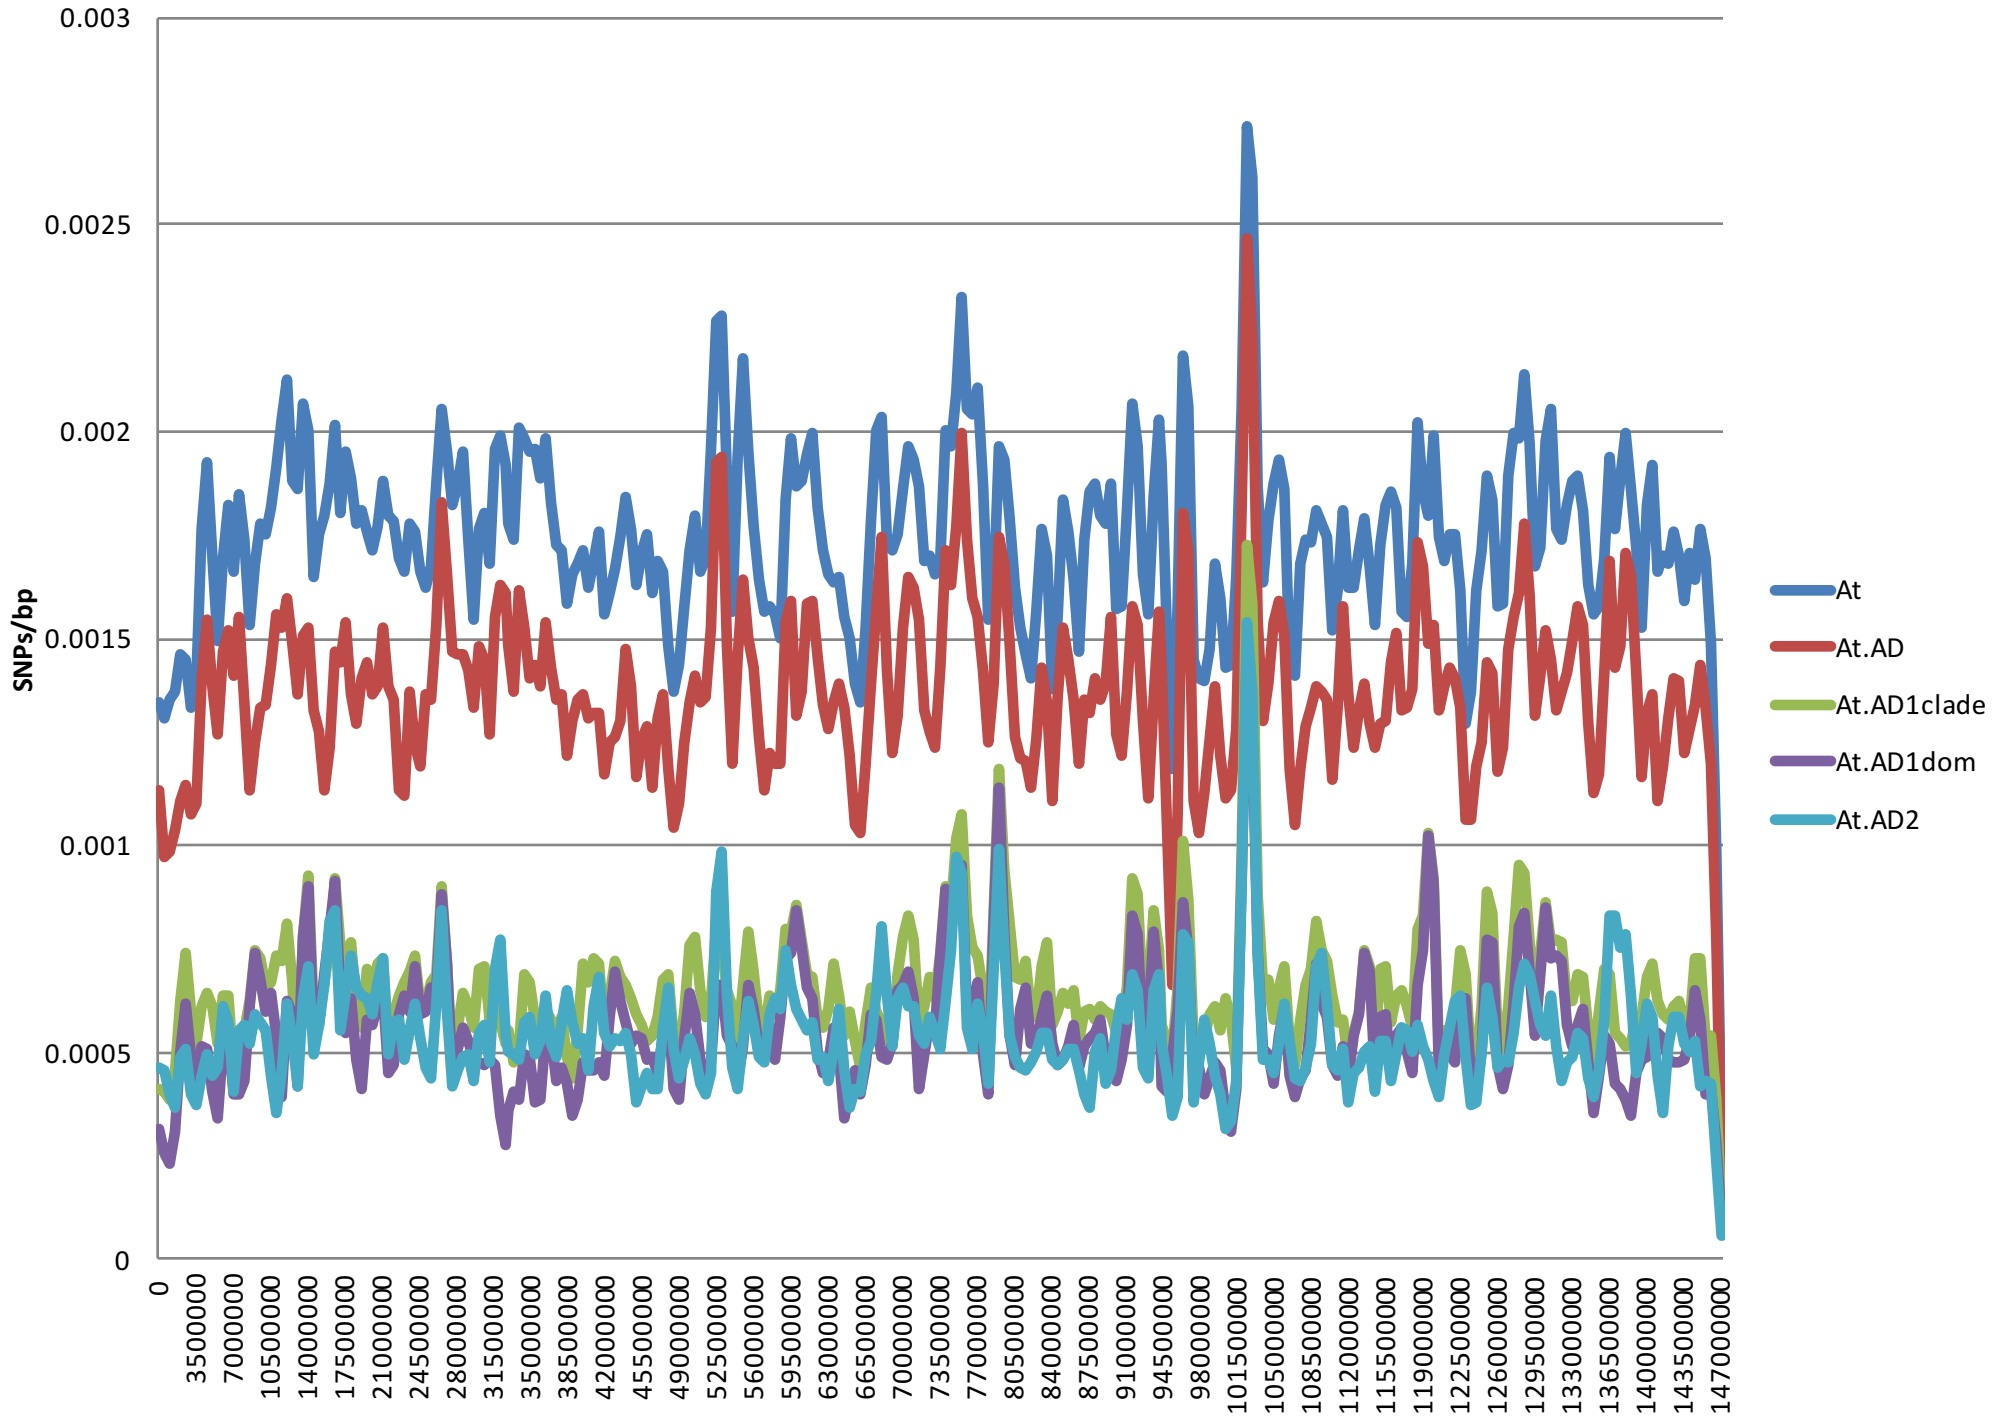

### Chr2

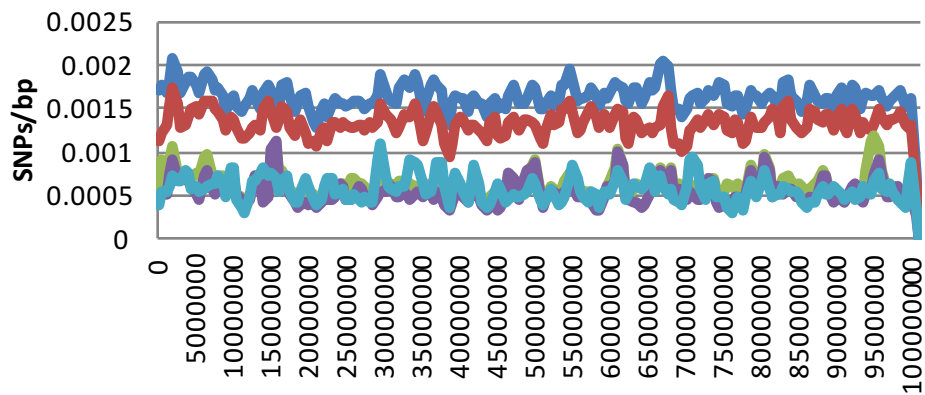

### Chr3

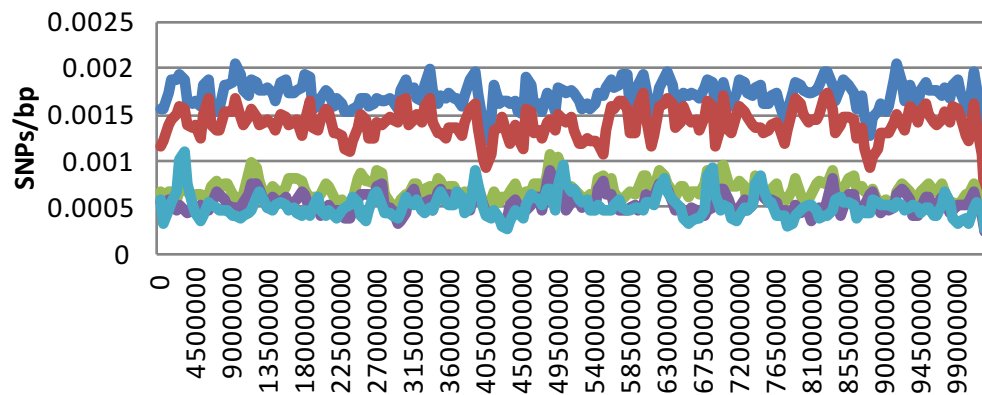

### Chr4

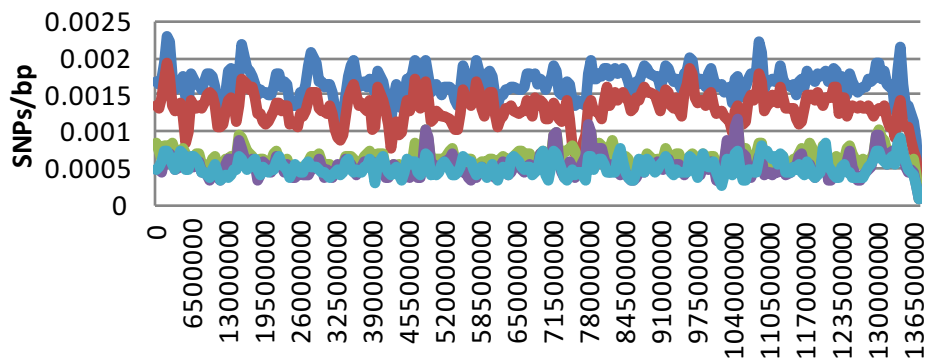

### Chr5

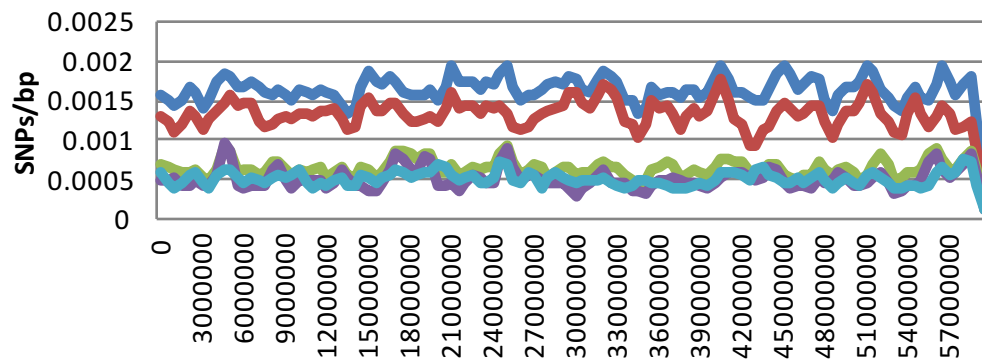

### Chr6

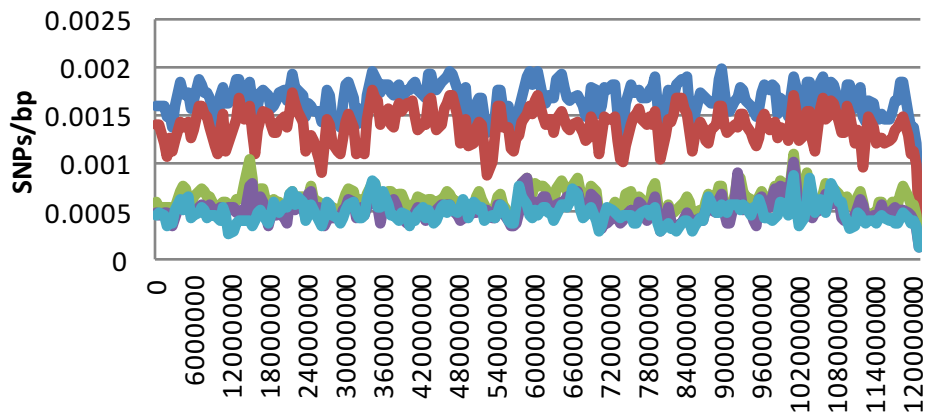

### Chr7

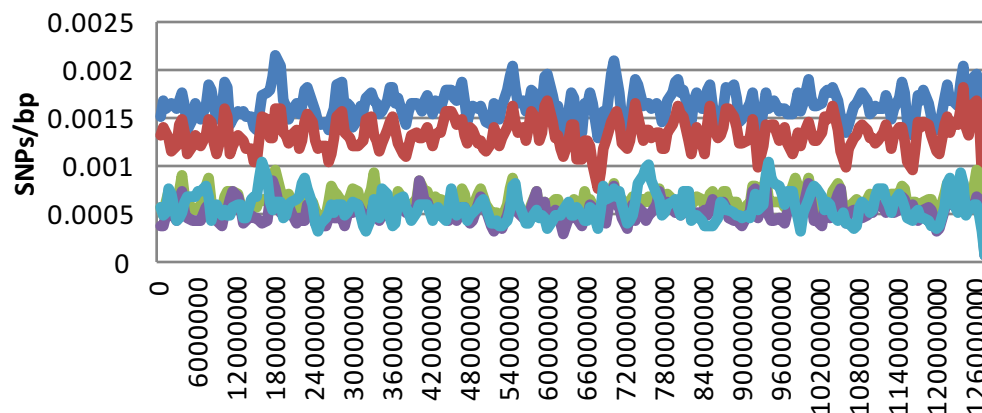

### Chr8

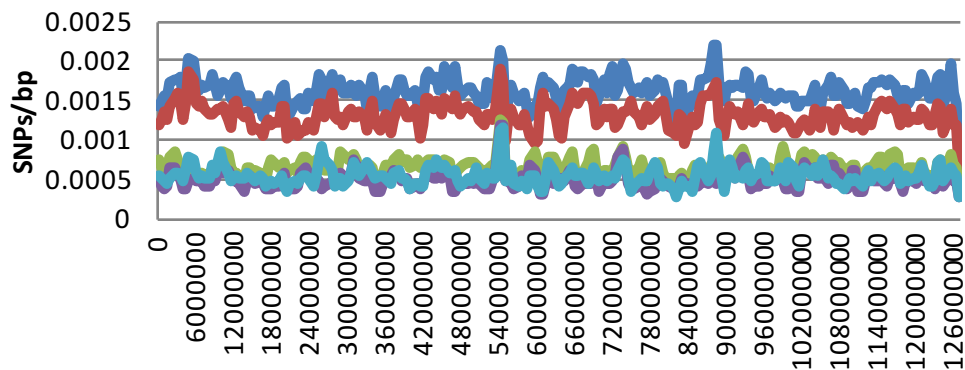

### Chr9

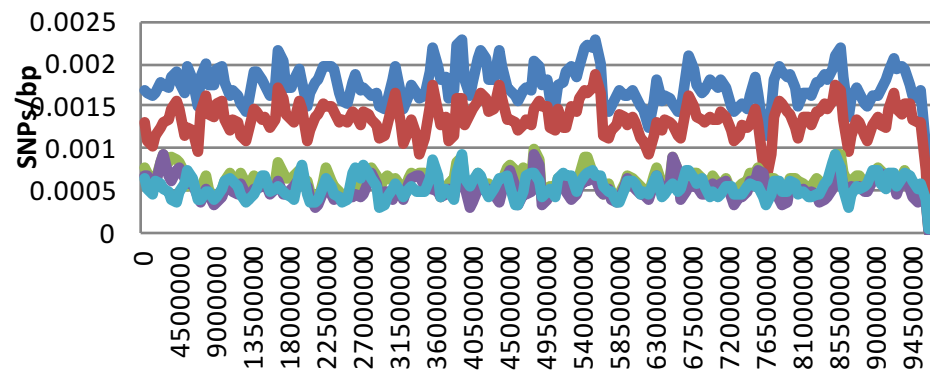

### Chr10

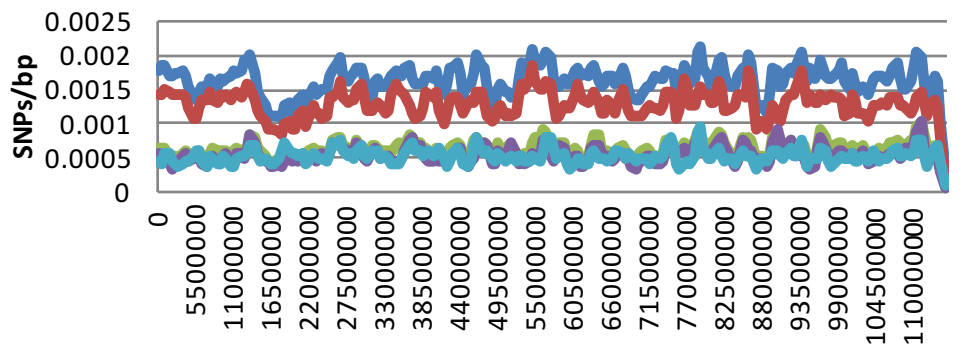

### Chr11

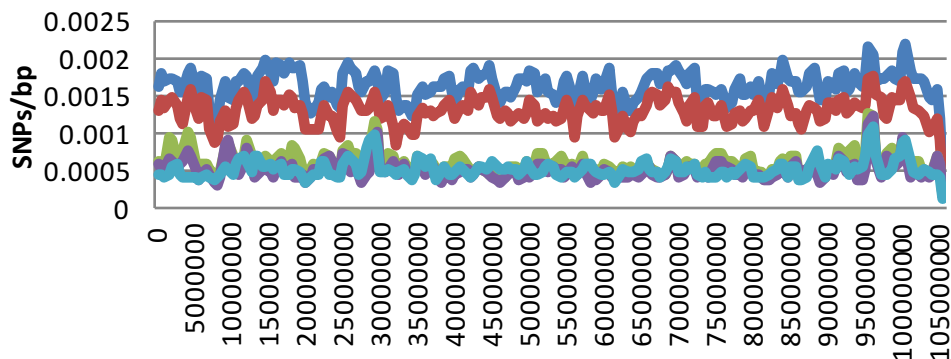

### Chr12

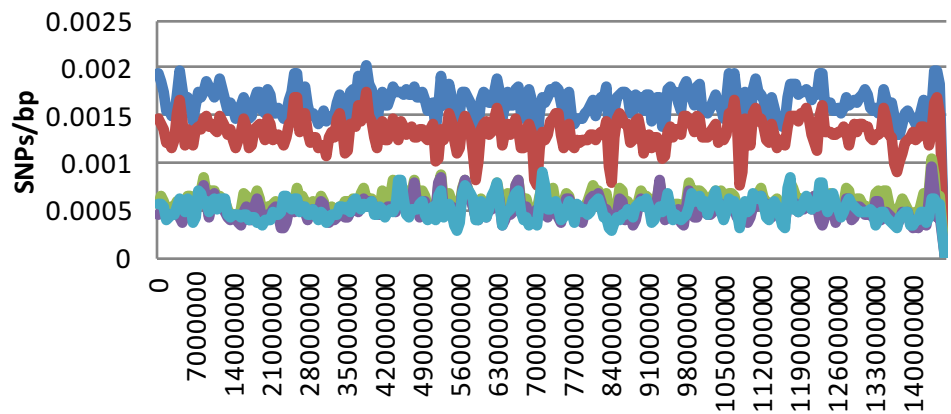

### Chr13

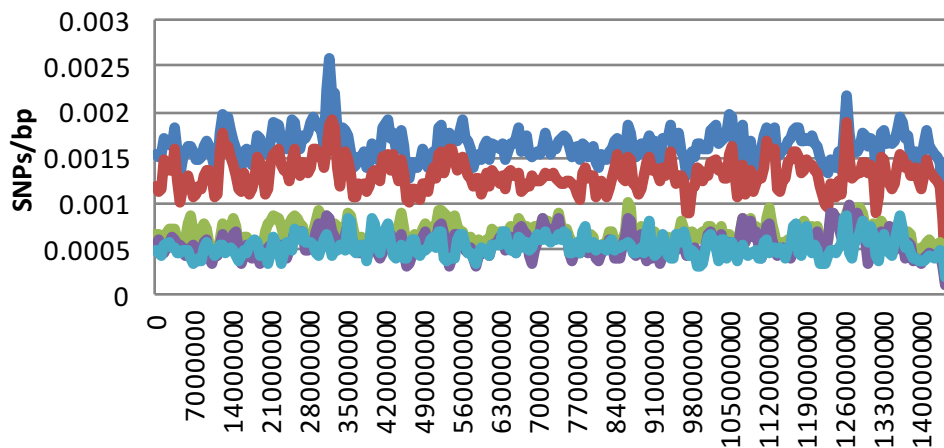

# Chr01

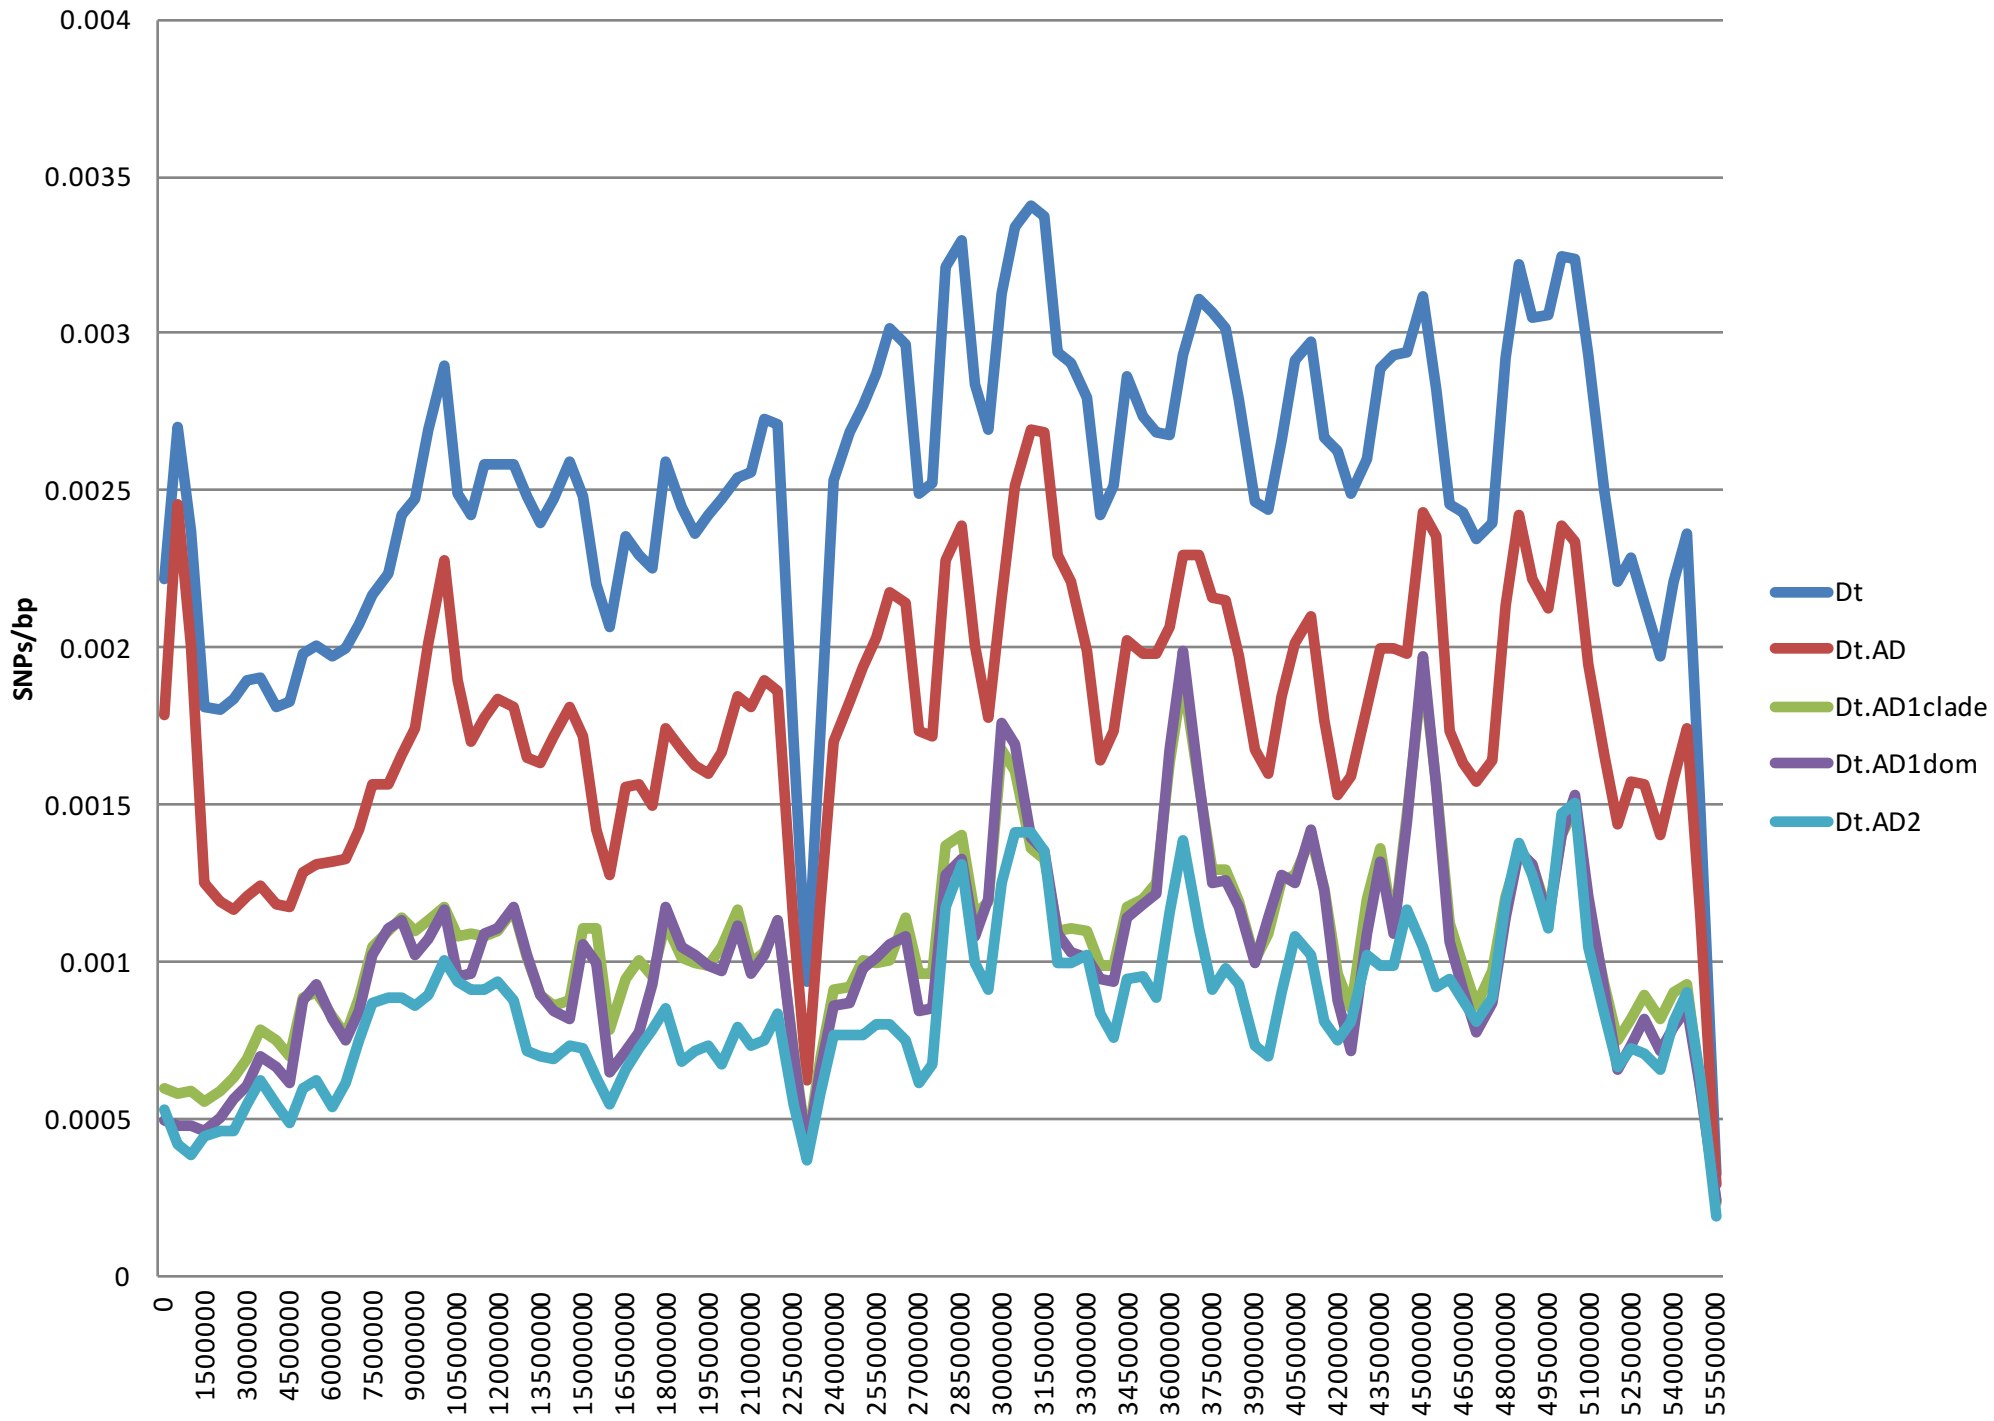

### Chr02

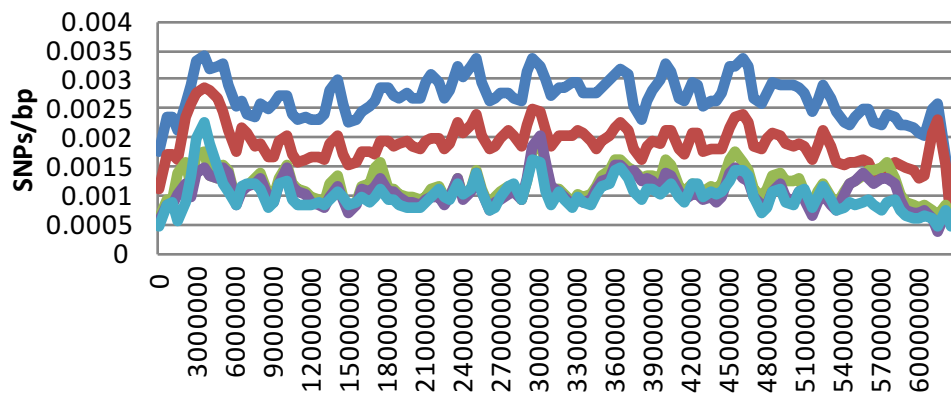

### Chr03

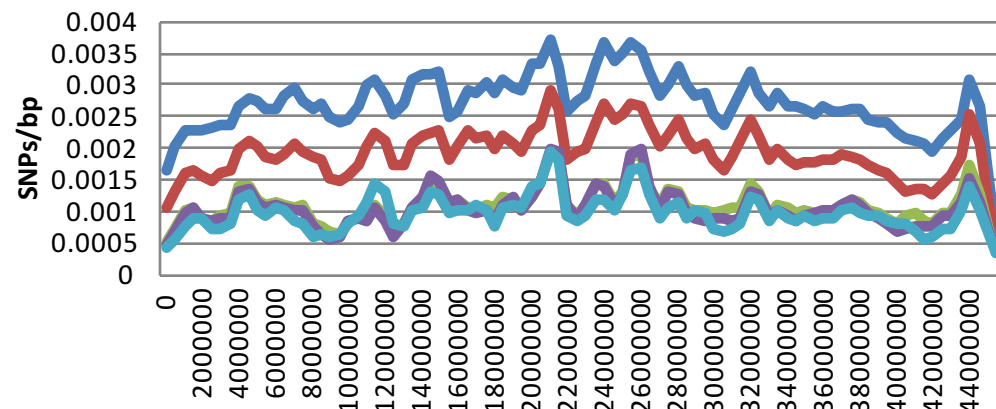

### Chr04

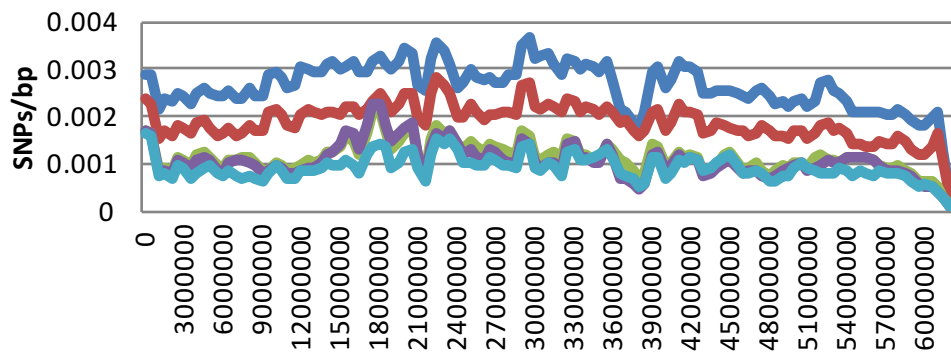

### Chr05

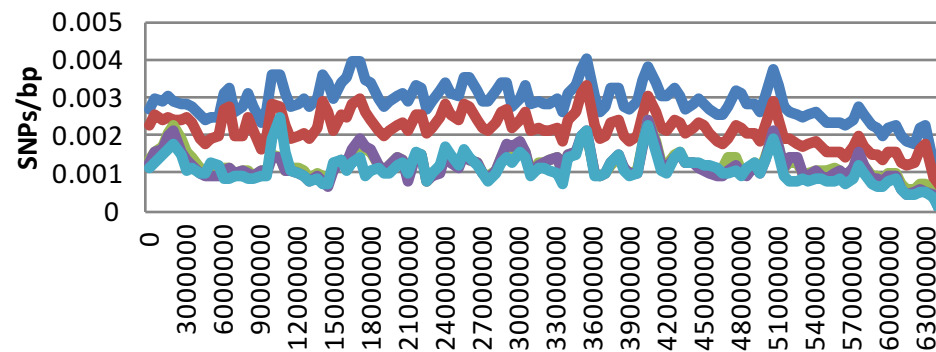

### Chr06

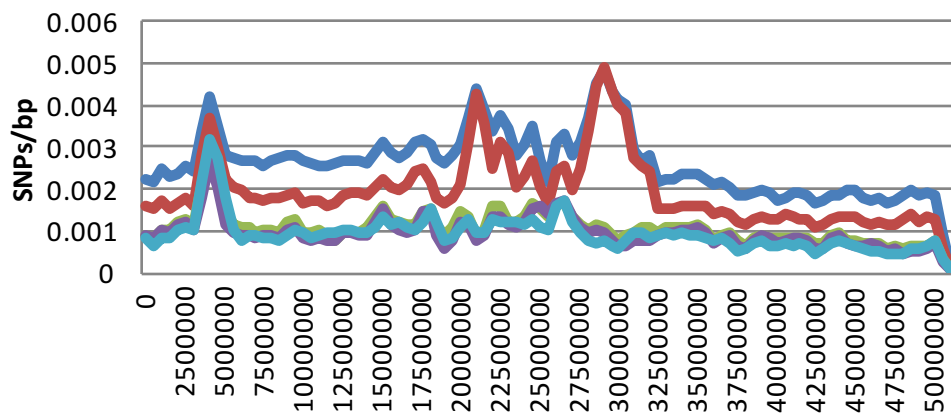

### Chr07

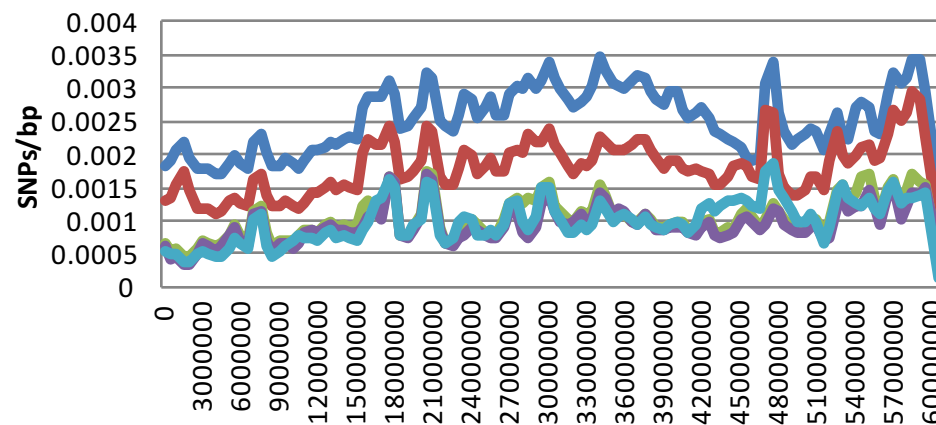

**Chr08**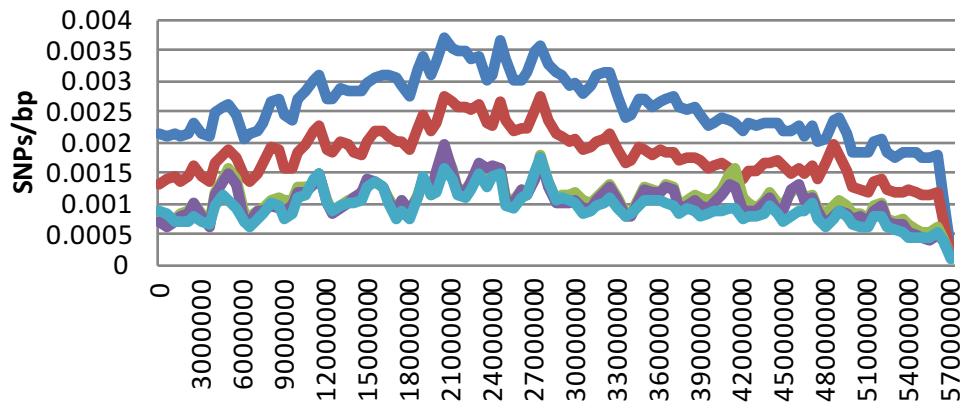**Chr09**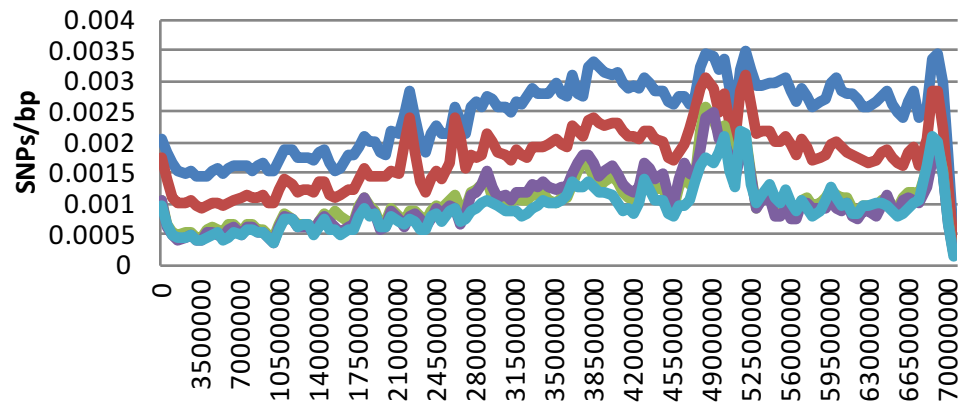**Chr10**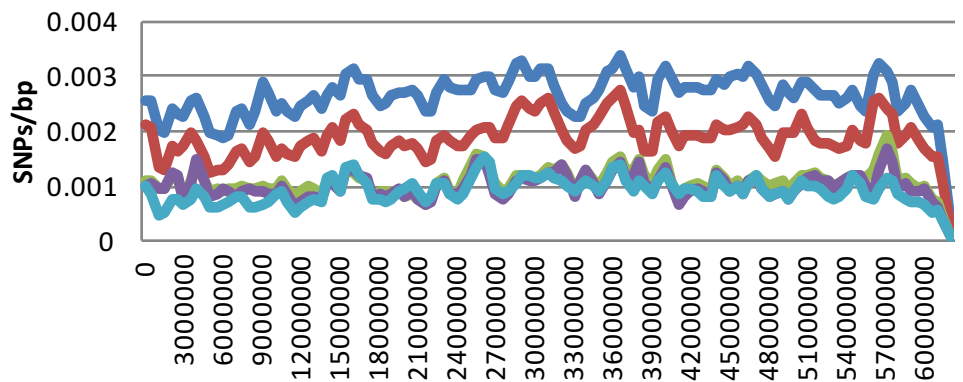**Chr11**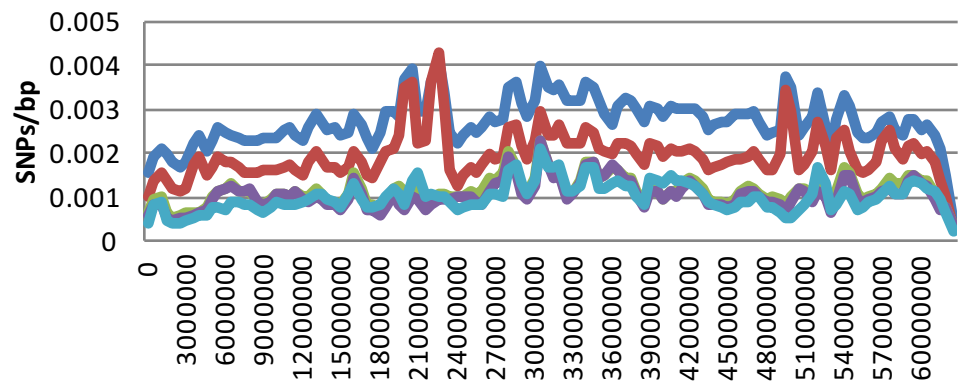**Chr12**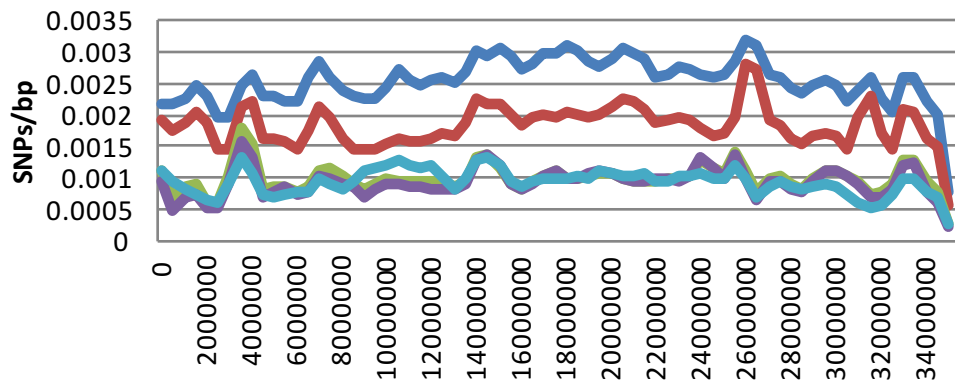**Chr13**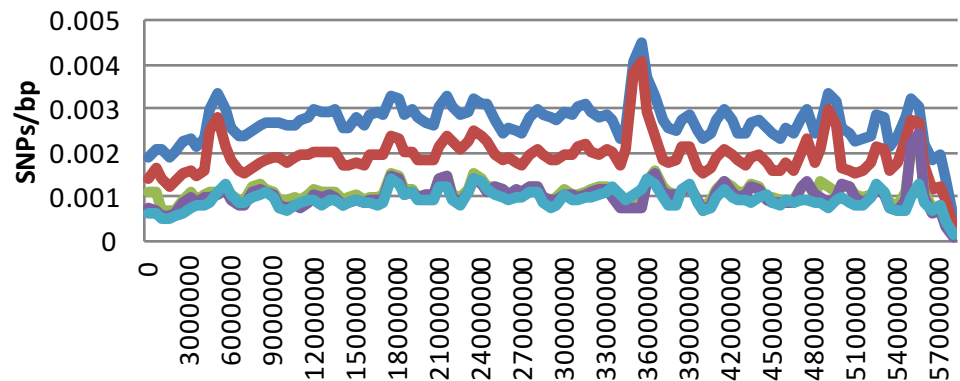

Supplement: pgen.1006012.s007.pdf [file pgen.1006012.s007.pdf]
