# Supplementary material for: DNA Sequence Evolution and Rare Homoeologous Conversion in Tetraploid Cotton
Source: PubMed Central journal article supplement (PMC4864293; doi:10.1371/journal.pgen.1006012), 2016-05-11

S3 Fig

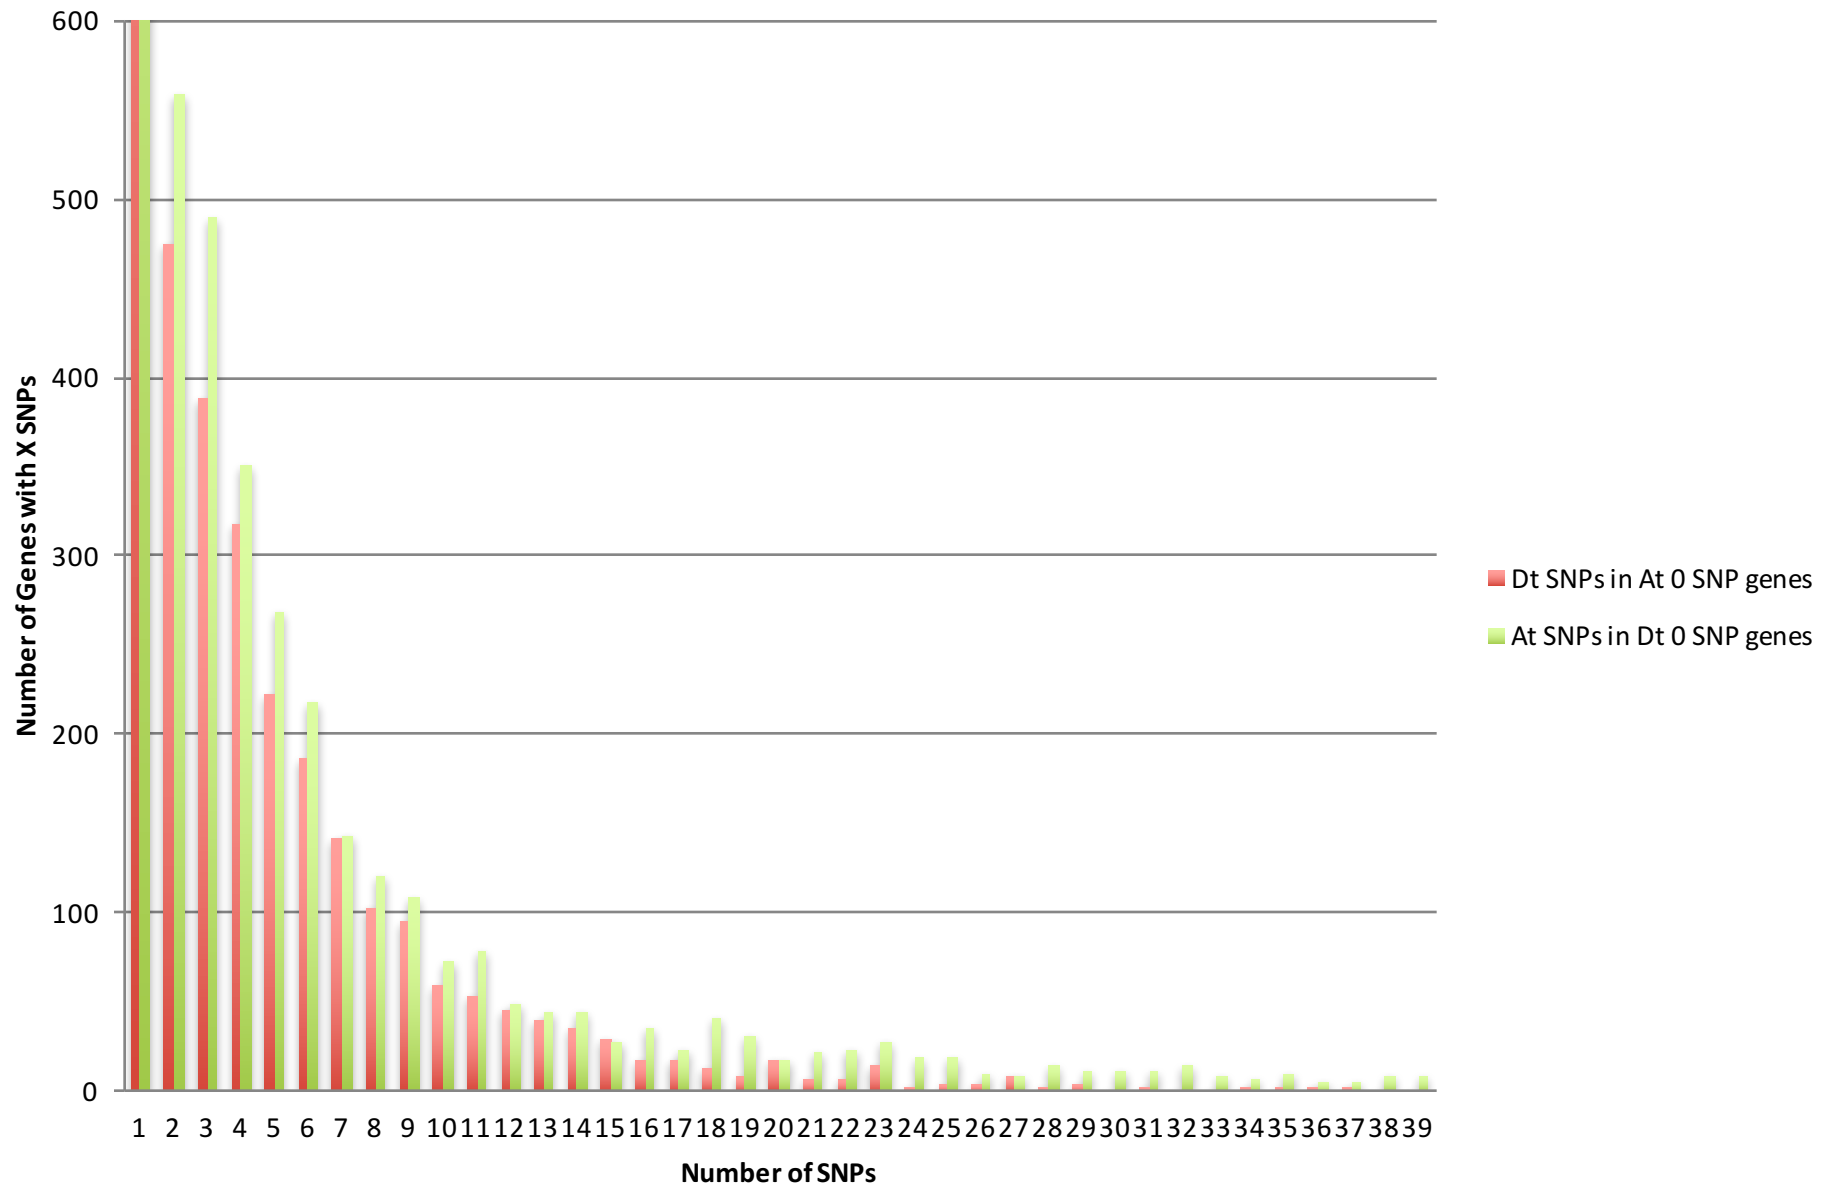

Supplement: pgen.1006012.s009.pdf [file pgen.1006012.s009.pdf]
